# Supplementary material for: Deciphering the genetic interactions between Pou4f3, Gfi1, and Rbm24 in maintaining mouse cochlear hair cell survival
Source: bioRxiv preprint, doi:10.1101/2023.06.22.546097, version 3 (2024-02-20)
Supplement: Supplementary file 1 [file 546097_file02.xlsx]

## Sheet: sgRNA list
sgRNA	Sequence (5'→3'）
sgRNA-1	caagcagaggcgcatcaagt
sgRNA-2	ataagcattctggtaacctc
sgRNA-3	tggcatcgcccccttccgat
sgRNA-4	atggactcaaatgagtaccc
sgRNA-5	atcaccagccgcgttctccg
sgRNA-6	gggacagccagggagctgcg
sgRNA-7	ccaggtaagatcggcgctgg
sgRNA-8	tccagaggaaggtggatctc
sgRNA-9	aggagtacattgacactgtg
sgRNA-10	accggcagaccggcaagtcc
